# Supplementary material
Source: publisher figshare collection journal article supplement (https://tandf.figshare.com/ndownloader/files/13140881)
Supplement: Supplementary file 1 [file 13140881]

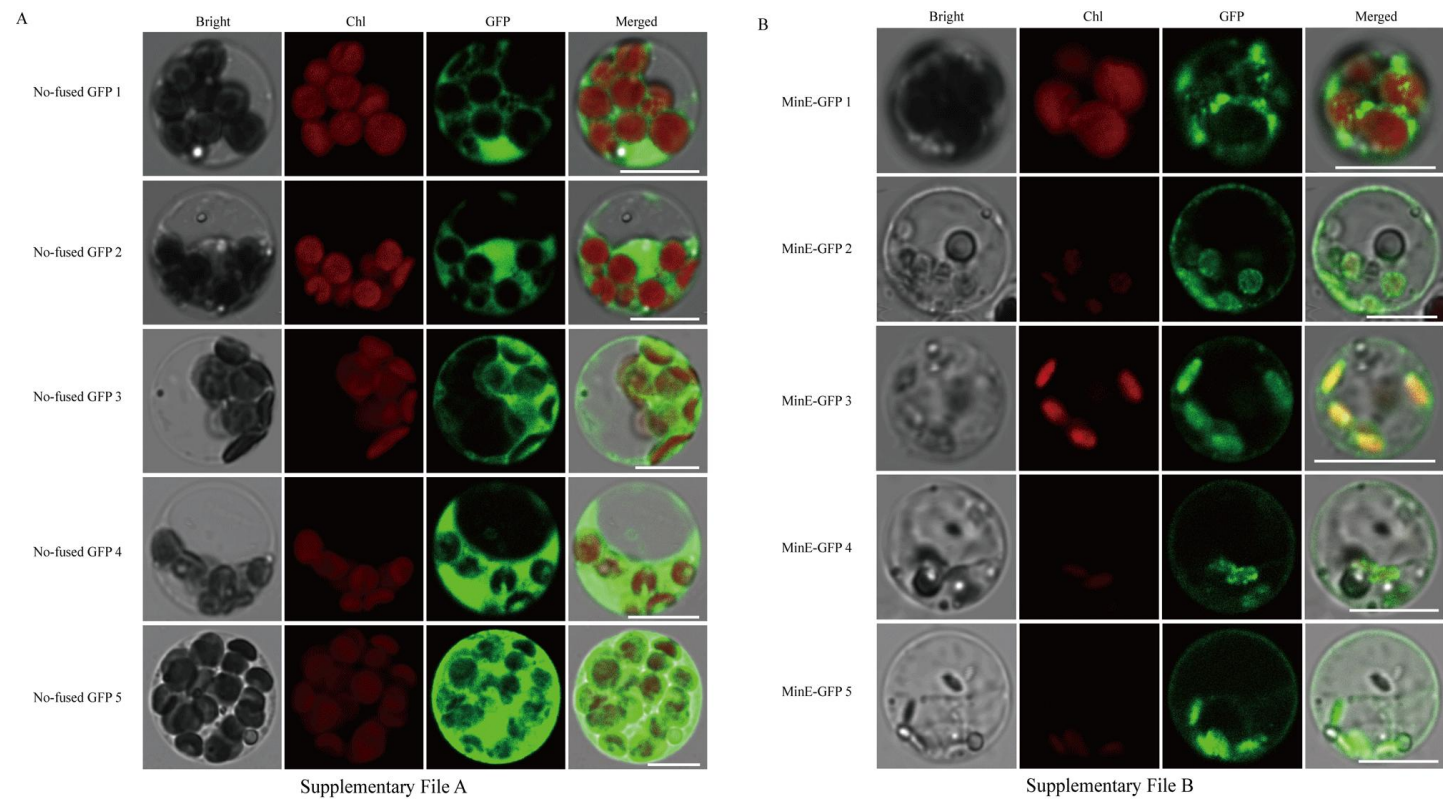

## Supplementary materials

(A) Five groups of protoplasts that have been transfected with no-fused GFP plasmid after 16 h of incubation.

(B) Five groups of protoplasts that have been transfected with MeMinE-GFP plasmid after 16 h of incubation.

We have demonstrated that the MeMinE protein is located in chloroplast.
